# Supplementary material for: The I-DECIDED clinical decision-making tool for peripheral intravenous catheter assessment and safe removal: a clinimetric evaluation
Source: PubMed Central journal article supplement — BMJ Open. 2020 Jan 21;10(1):e035239. doi: 10.1136/bmjopen-2019-035239 (PMC7044901; doi:10.1136/bmjopen-2019-035239), 2020-01-21
Supplement: bmjopen-2019-035239supp001.pdf [file bmjopen-2019-035239supp001.pdf]

## I-DECIDED

**Appendix 1. Content Validity Questionnaire: I-DECIDED device assessment and removal tool**

Each item of the tool is based on a 'Key principle', with prompts for assessment and action.

Please **circle the number** that best rates the relevance of the statements listed below about the proposed components of the I-DECIDED tool.

Each section is followed by a space for your comment (E.g. Are any important concepts missing? Ease of comprehension? Language issues?).

KEY FOR SCORING ITEMS:

**1 = NOT RELEVANT, 2 = SOMEWHAT RELEVANT, 3 = QUITE RELEVANT, 4 = HIGHLY RELEVANT**

| <b>I. IDENTIFY presence of IV device</b> |                                                                                                                                           | <b>Please circle the relevant number</b> |   |   |   |
|------------------------------------------|-------------------------------------------------------------------------------------------------------------------------------------------|------------------------------------------|---|---|---|
| 1                                        | <i>Key principle 1: The presence of an IV device should be assessed each shift.</i>                                                       | 1                                        | 2 | 3 | 4 |
| 2                                        | Does the patient have an IV device? (Inspect the patient and ask the patient if unsure)                                                   | 1                                        | 2 | 3 | 4 |
| 3                                        | Has the patient had an IV device removed in the past 48 hours? (Ask the patient)                                                          | 1                                        | 2 | 3 | 4 |
| 4                                        | If the patient has had an IV device removed in the past 48 hours, observe site for complications (post-infusion phlebitis and purulence). | 1                                        | 2 | 3 | 4 |

**Comments:** \_\_\_\_\_

| <b>II. DOES the patient need this IV device?</b> |                                                                                                    | <b>Please circle the relevant number</b> |   |   |   |
|--------------------------------------------------|----------------------------------------------------------------------------------------------------|------------------------------------------|---|---|---|
| 5                                                | <i>Key principle 2: The need for the IV device should be assessed each shift.</i>                  | 1                                        | 2 | 3 | 4 |
| 6                                                | Has the IV device been used in the past 24 hours, or is it likely to be used in the next 24 hours? | 1                                        | 2 | 3 | 4 |
| 7                                                | Can the patient switch to oral medications? Discuss with pharmacist and treating team.             | 1                                        | 2 | 3 | 4 |
| 8                                                | When no longer needed, the IV device should be removed.                                            | 1                                        | 2 | 3 | 4 |

**Comments:** \_\_\_\_\_

| <b>III. EFFECTIVE flow and flush?</b> |                                                                                                  | <b>Please circle the relevant number</b> |   |   |   |
|---------------------------------------|--------------------------------------------------------------------------------------------------|------------------------------------------|---|---|---|
| 9                                     | <i>Key principle 3: Effective flow and flush of the IV device should be assessed each shift.</i> | 1                                        | 2 | 3 | 4 |
| 10                                    | Does the IV device flow well?                                                                    | 1                                        | 2 | 3 | 4 |
| 11                                    | Does the IV device flush well?                                                                   | 1                                        | 2 | 3 | 4 |
| 12                                    | If the IV device does not flow and flush, it should be removed.                                  | 1                                        | 2 | 3 | 4 |

**Comments:** \_\_\_\_\_

## I-DECIDED

| <b>IV. COMPLICATIONS or CONCERNS</b> |                                                                                                                                     | <b>Please circle the relevant number</b> |   |   |   |
|--------------------------------------|-------------------------------------------------------------------------------------------------------------------------------------|------------------------------------------|---|---|---|
| 13                                   | <i>Key principle 4: The IV site should be assessed for complications or concerns each shift.</i>                                    | 1                                        | 2 | 3 | 4 |
| 14                                   | Patient-reported pain $\geq$ 2 out of 10?                                                                                           | 1                                        | 2 | 3 | 4 |
| 15                                   | Redness > 1 cm from insertion site                                                                                                  | 1                                        | 2 | 3 | 4 |
| 16                                   | Swelling > 1 cm from insertion site                                                                                                 | 1                                        | 2 | 3 | 4 |
| 17                                   | Any discharge at site                                                                                                               | 1                                        | 2 | 3 | 4 |
| 18                                   | Infiltration (IV fluid in surrounding tissues)                                                                                      | 1                                        | 2 | 3 | 4 |
| 19                                   | Hardness (induration) of insertion site                                                                                             | 1                                        | 2 | 3 | 4 |
| 20                                   | Palpable cord                                                                                                                       | 1                                        | 2 | 3 | 4 |
| 21                                   | Other concerns? (itch, rash, blistering, etc.)                                                                                      | 1                                        | 2 | 3 | 4 |
| 22                                   | If complications occur, the IV device should be removed, after consultation with the treating team. Insert new IV device if needed. | 1                                        | 2 | 3 | 4 |

**Comments:** \_\_\_\_\_

| <b>V. INFECTION prevention and control</b> |                                                                                                                                                                                                                 | <b>Please circle the relevant number</b> |   |   |   |
|--------------------------------------------|-----------------------------------------------------------------------------------------------------------------------------------------------------------------------------------------------------------------|------------------------------------------|---|---|---|
| 23                                         | <i>Key principle 5: Infection prevention and control practices should be performed each shift.</i>                                                                                                              | 1                                        | 2 | 3 | 4 |
| 24                                         | Use Aseptic Non-Touch Technique (ANTT)                                                                                                                                                                          | 1                                        | 2 | 3 | 4 |
| 25                                         | Hand hygiene                                                                                                                                                                                                    | 1                                        | 2 | 3 | 4 |
| 26                                         | Scrub the hub as per protocol and allow to dry before accessing IV device                                                                                                                                       | 1                                        | 2 | 3 | 4 |
| 27                                         | Any fever of unknown origin?                                                                                                                                                                                    | 1                                        | 2 | 3 | 4 |
| 28                                         | Elevated white blood cell count?                                                                                                                                                                                | 1                                        | 2 | 3 | 4 |
| 29                                         | If the patient has a fever and/or elevated white blood cell count, with no obvious source of infection, the IV device should be removed and the IV site cultured as a possible source of bloodstream infection. | 1                                        | 2 | 3 | 4 |
| 30                                         | Purulent discharge at the insertion site?                                                                                                                                                                       | 1                                        | 2 | 3 | 4 |
| 31                                         | If the IV site has purulent discharge, the IV device should be removed and the IV site cultured as a possible source of bloodstream infection.                                                                  | 1                                        | 2 | 3 | 4 |

**Comments:** \_\_\_\_\_

| <b>VI. DRESSING and securement</b> |                                                                                                | <b>Please circle the relevant number</b> |   |   |   |
|------------------------------------|------------------------------------------------------------------------------------------------|------------------------------------------|---|---|---|
| 32                                 | <i>Key principle 6: Dressing and securement practice should be assessed each shift.</i>        | 1                                        | 2 | 3 | 4 |
| 33                                 | Is the IV dressing clean, dry, and intact?                                                     | 1                                        | 2 | 3 | 4 |
| 34                                 | If the IV dressing is moist, visibly soiled, or has loose/lifting edges, it should be changed. | 1                                        | 2 | 3 | 4 |
| 35                                 | Is the IV device and infusion tubing secured?                                                  | 1                                        | 2 | 3 | 4 |

## I-DECIDED

|    |                                                           |   |   |   |   |
|----|-----------------------------------------------------------|---|---|---|---|
| 36 | Secure well with securement device, tape, net or bandage. | 1 | 2 | 3 | 4 |
|----|-----------------------------------------------------------|---|---|---|---|

**Comments:** \_\_\_\_\_

| <b>VII. EVALUATE and EDUCATE</b> |                                                                                                                        | <b>Please circle the relevant number</b> |   |   |   |
|----------------------------------|------------------------------------------------------------------------------------------------------------------------|------------------------------------------|---|---|---|
| 37                               | <i>Key principle 7: The patient/family's knowledge and education needs should be assessed each shift, if possible.</i> | 1                                        | 2 | 3 | 4 |
| 38                               | Evaluate patient/family understanding of reason for IV and plan for removal, if possible.                              | 1                                        | 2 | 3 | 4 |
| 39                               | Educate patient/family as needed, if possible.                                                                         | 1                                        | 2 | 3 | 4 |

**Comments:** \_\_\_\_\_

| <b>VIII. DOCUMENT</b> |                                                                                              | <b>Please circle the relevant number</b> |   |   |   |
|-----------------------|----------------------------------------------------------------------------------------------|------------------------------------------|---|---|---|
| 40                    | <i>Key principle 8: The IV assessment and actions taken should be documented each shift.</i> | 1                                        | 2 | 3 | 4 |
| 41                    | Insertion date and time                                                                      | 1                                        | 2 | 3 | 4 |
| 42                    | I-DECIDED assessment and relevant action taken                                               | 1                                        | 2 | 3 | 4 |
| 43                    | Removal date and time                                                                        | 1                                        | 2 | 3 | 4 |

**Comments:** \_\_\_\_\_

| <b>IX. DECIDE and ACT</b> |                                                                                                                                                                 | <b>Please circle the relevant number</b> |   |   |   |
|---------------------------|-----------------------------------------------------------------------------------------------------------------------------------------------------------------|------------------------------------------|---|---|---|
| 44                        | <i>Key principle 9: The decision to continue or remove the IV device should be based on assessment and consultation with the treating team and the patient.</i> | 1                                        | 2 | 3 | 4 |
| 45                        | <b>Based on this assessment (in consultation with treating team and patient), I-DECIDED . . .</b>                                                               | 1                                        | 2 | 3 | 4 |
| 46                        | IV device should remain in place. No other change.                                                                                                              | 1                                        | 2 | 3 | 4 |
| 47                        | IV device should remain in place, but dressing change done. IV and infusion tubing well secured.                                                                | 1                                        | 2 | 3 | 4 |
| 48                        | IV device removed and not replaced, in consultation with the treating team.                                                                                     | 1                                        | 2 | 3 | 4 |
| 49                        | IV device removed and replaced. Consulted with patient and team about best device and site.                                                                     | 1                                        | 2 | 3 | 4 |

**Comments:** \_\_\_\_\_
